# Supplementary material
Source: Springer Nature journal article supplement (https://www.springermedizin.de/resource/supplementary/12891_2012_1751_MOESM2_ESM.pdf/9508836)

# Survival Function

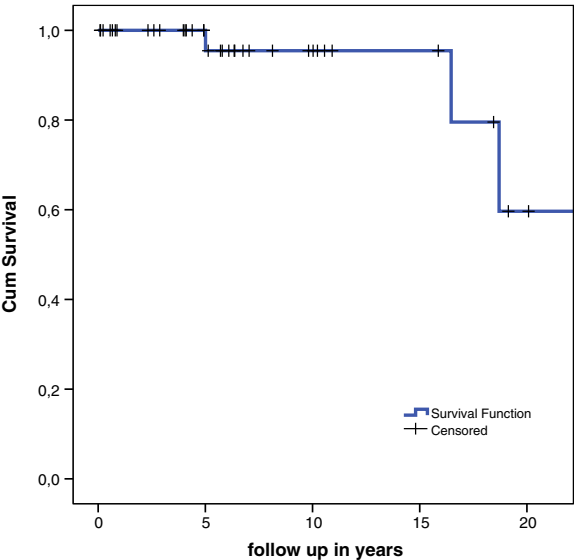

Supplement: MOESM2 [file 9508836]
